# Supplementary material
Source: PubMed Central journal article supplement (PMC9142137)
Supplement: mmc1.pdf [file mmc1.pdf]

# THE LANCET Microbe

## Supplementary appendix

This appendix formed part of the original submission. We post it as supplied by the authors.

Supplement to: Destras G, Bal A, Simon B, et al. Sotrovimab drives SARS-CoV-2 omicron variant evolution in immunocompromised patients. *Lancet Microbe* 2022; published online May 27. [https://doi.org/10.1016/S2666-5247\(22\)00120-3](https://doi.org/10.1016/S2666-5247(22)00120-3).

1 **Supplementary Appendix**

2 Table of contents

3 **Materials – Methods** ..... 1

4 Sequencing strategy ..... 1

5 Normalized viral load ..... 1

6 SARS-CoV-2 Sequencing ..... 1

7 Bioinformatics ..... 2

8 **Ethics** ..... 2

9 **Acknowledgements:** ..... 3

10 **Tables and figures** ..... 4

11 **Data availability** ..... 9

12

13

## 14 **Materials – Methods**

### 15 **Sequencing strategy and patients inclusion**

16 The routine genomic surveillance at the National Reference Center (NRC) of Respiratory  
17 Viruses of Hospices Civils de Lyon (HCL) is based on i) systematic sequencing of hospitalized  
18 patients of HCL ii) random sequencing of outpatients and hospitalized patients performed  
19 during weekly nationwide surveys where diagnostic laboratories sent a fraction of positive  
20 samples to the NRC of HCL and other sequencing centers. Clinical and demographical data  
21 were not always available, especially when considering nationwide surveys. Patients harboring  
22 a S:337 or S:340 mutation, with several samples including at least one before sotrovimab infusion  
23 were retained for follow-up analyses.

### 24 **Normalized viral load**

25 Normalized viral load kinetics was determined for patients with follow-up samples. Briefly,  
26 nucleic acid extraction from nasopharyngeal swab was performed on the automated MGISP-  
27 960 workstation using MGI Easy Magnetic Beads Virus DNA/RNA Extraction Kit (MGI Tech,  
28 Marupe, Latvia). Normalized viral load was determined on QuantStudio™ 5 Real-Time PCR  
29 System (ThermoFisher Scientific, Waltham, Massachusetts, USA) with the QUANTI SARS-CoV-  
30 2 R-GENE® kit (bioMérieux, Lyon, France), according to the manufacturer recommendation.  
31 This test includes four quantification standards targeting the SARS-CoV-2 N gene and four  
32 quantification standards targeting the HPRT1 housekeeping gene in order to normalize the  
33 viral load according to the sampling quality, i.e. the number of cells present in the sample.

### 34 **SARS-CoV-2 Sequencing**

35 After nucleic acid extraction, SARS-CoV-2 sequencing was performed using COVIDSeq-Test™  
36 (Illumina, San Diego, USA) with Artic V4 or V4.1 primers as they became available. Libraries  
37 were sequenced with 100 bp paired-end reads using the NovaSeq 6000 Sequencing system SP  
38 flow cell.

### 39 **Bioinformatics**

40 Reads were processed using the in-house bioinformatic pipeline seqmet (available at  
41 <https://github.com/genepii/seqmet>). Trimming of paired reads was performed with cutadapt  
42 to remove sequencing adapters and low-quality ends. Alignment to the SARS-CoV-2 reference  
43 genome MN908947 was performed by minimap2. Duplicate reads tagged by picard were  
44 removed, remaining reads were realigned by abra2 to improve indel detection sensitivity and  
45 finally clipped with samtools ampliconclip to remove read ends containing primer sequences.  
46 Variant calling with freebayes permitted to obtain variants present at frequencies of 5% or  
47 above, which were decomposed and normalized with vt and filtered with bcftools to eliminate  
48 false positives.

### 49 **Ethics**

50 Samples used in this study were collected as part of an approved ongoing surveillance  
51 conducted by the NRC of HCL, Lyon, France. The investigations were carried out in accordance  
52 with the General Data Protection Regulation (Regulation (EU) 2016/679 and Directive  
53 95/46/EC) and the French data protection law (Law 78–17 on 06 January 1978 and Décret  
54 2019–536 on 29 May 2019). Samples were collected for regular clinical management, with no  
55 additional samples for the purpose of this study. Patients were informed of the research and

56 their nonobjection approval was confirmed. This study was approved by the ethics committee  
57 of HCL and registered on the HCL database of RIPHN studies (AGORA N°41).

58

59 **Acknowledgements:**

60 We would like to thank all the members of the GenEPII sequencing platform who contributed  
61 to this investigation. We also thank all the laboratories, clinicians and patients involved in this  
62 work. This work was carried out within the framework of the French consortium on  
63 surveillance and research on infections with emerging pathogens via microbial genomics  
64 (consortium relatif à la surveillance et à la recherche sur les infections à pathogènes  
65 EMERgents via la GENomique microbienne EMERGEN;  
66 <https://www.santepubliquefrance.fr/dossiers/coronavirus-covid-19/consortium-emerg>

67 We thank the authors, the originating and submitting laboratories for their sequence and  
68 metadata shared through GISAID on which this research is based.

69

70 **Tables and figures**

71

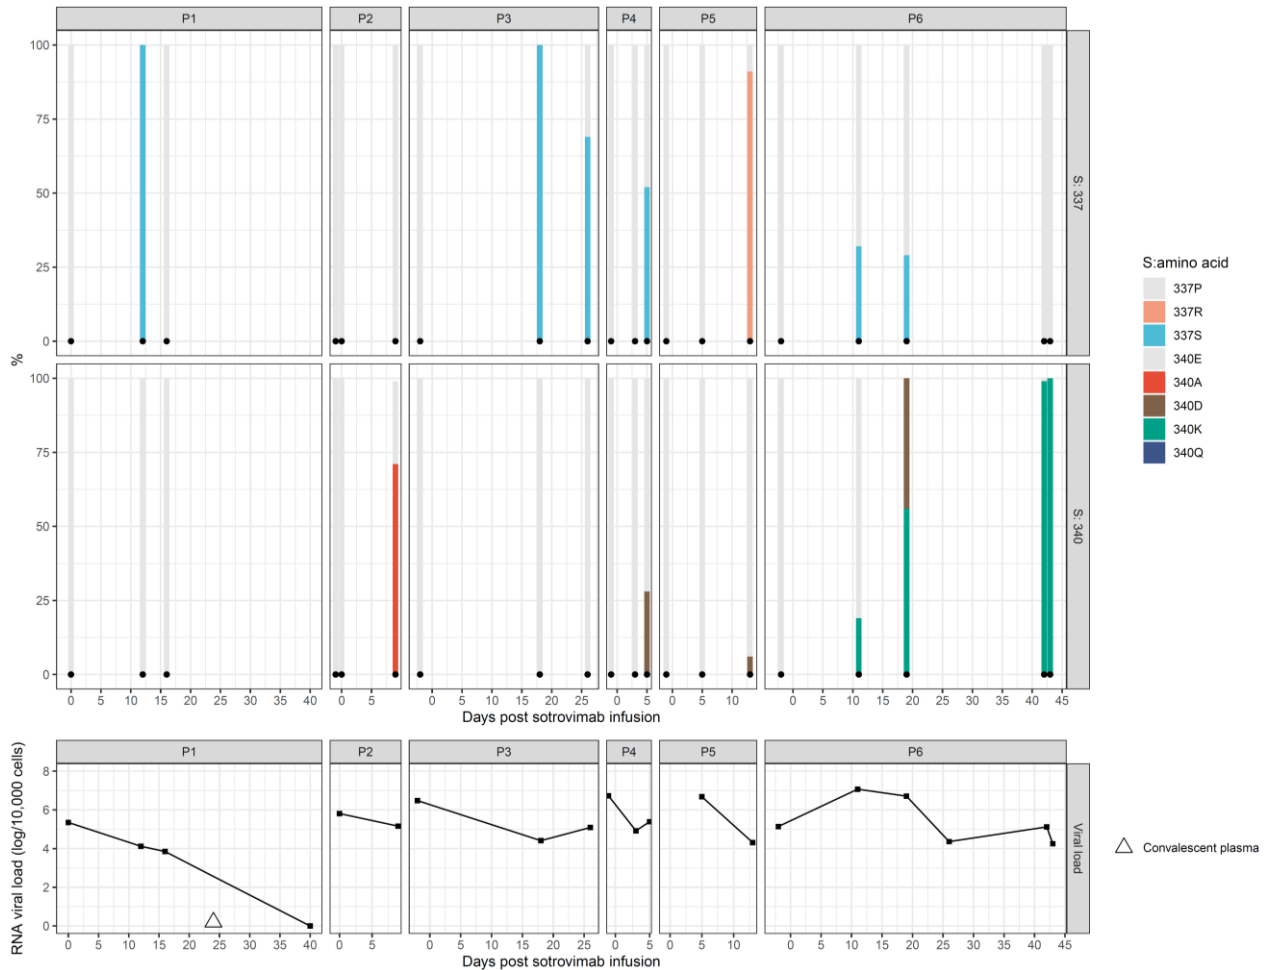

73 **Figure 1.** Virological follow-up of immunocompromised patients treated with sotrovimab

74 The above panel shows bars representing relative frequencies of S:337 and S:340 amino-acid

75 substitutions occurring over time after treatment with sotrovimab in immunocompromised

76 patients (n=6). Each colour represents a different amino-acid substitution. Triangle for

77 patient #1 represents convalescent plasma infusion.

78 Normalized SARS-CoV-2 viral loads expressed as  $\log_{10}(\text{RNA})/10,000$  human cells are

79 represented on the bottom panel.

|    | Virus name GISAID                       | S:337 or S:340 mutation | Patient | available clinical data | Pangolin lineage |
|----|-----------------------------------------|-------------------------|---------|-------------------------|------------------|
|    | hCoV-19/France/ARA-HCL022026019301/2022 | S:P337S                 | P1      | yes                     | BA.1             |
|    | hCoV-19/France/ARA-HCL022026296401/2022 | S:E340A                 | P2      | yes                     | BA.1             |
|    | hCoV-19/France/ARA-HCL022033319501/2022 | S:P337S                 | P3      | yes                     | BA.1             |
|    | hCoV-19/France/ARA-HCL022037698401/2022 | S:P337S                 | P3      | yes                     | BA.1             |
|    | hCoV-19/France/ARA-HCL122004037701/2022 | S:P337S                 | P4      | yes                     | BA.1             |
|    | hCoV-19/France/ARA-HCL122005810301/2022 | S:P337R                 | P5      | yes                     | BA.1             |
|    | hCoV-19/France/ARA-HCL022035008101/2022 | S:E340K                 | P6      | yes                     | BA.1             |
|    | hCoV-19/France/ARA-HCL022050390701/2022 | S:E340K                 | P6      | yes                     | BA.1             |
|    | hCoV-19/France/ARA-HCL122009595001/2022 | S:E340K                 | P6      | yes                     | BA.1             |
|    | hCoV-19/France/ARA-HCL022044350101/2022 | S:E340Q                 | P7      | yes                     | BA.1             |
|    | hCoV-19/France/NAQ-HCL022053231601/2022 | S:E340D                 | P8      | yes                     | BA.2             |
|    | hCoV-19/Mayotte/HCL022009868901/2022    | S:E340D                 | P9      | no                      | BA.1             |
|    | hCoV-19/France/ARA-HCL022026894802/2022 | S:P337S                 | P10     | no                      | BA.1             |
|    | hCoV-19/France/ARA-HCL022038419401/2022 | S:P337R                 | P11     | no                      | BA.1             |
|    | hCoV-19/France/ARA-HCL022039160001/2022 | S:E340D                 | P12     | no                      | BA.1             |
|    | hCoV-19/France/ARA-HCL122010159301/2022 | S:E340K                 | P13     | no                      | BA.1             |
|    | hCoV-19/France/ARA-HCL122009230601/2022 | S:E340K                 | P13     | no                      | BA.1             |
|    | hCoV-19/France/ARA-HCL122008542401/2022 | S:E340K                 | P13     | no                      | BA.1             |
|    | hCoV-19/France/ARA-HCL022005448201/2022 | S:P337L                 | P14     | no                      | BA.1             |
|    | hCoV-19/France/ARA-HCL722000683101/2022 | S:P337L                 | P14     | no                      | BA.1             |
|    | hCoV-19/France/COR-HCL722000704801/2022 | S:P337S                 | P15     | no                      | BA.1             |
|    | hCoV-19/France/NAQ-HCL722000985401/2022 | S:E340D                 | P16     | no                      | BA.1             |
|    | hCoV-19/France/NAQ-HCL722000782201/2022 | S:E340D                 | P16     | no                      | BA.1             |
|    | hCoV-19/France/OCC-HCL722001156601/2022 | S:E340D                 | P17     | no                      | BA.1             |
| 80 | hCoV-19/France/ARA-HCL722001540001/2022 | S:E340K                 | P18     | no                      | BA.1             |

81

82 **Table S1.** Omicron viruses sequenced at National Reference Center for respiratory viruses  
83 (Lyon, France) harboring S:337 and/or S:440 mutations.

84

| Patient | Age | Sex | GISAID Virus name                       | clade (Nextstrain) | Pangolin lineage | Days since sotrovimab infusion | S:P337 and/or S:E340 mutations               | Number of days between symptoms onset and sotrovimab infusion | Other antiviral treatments | negative result   | Comorbidities                                            | Vaccinated | Delay since last dose |
|---------|-----|-----|-----------------------------------------|--------------------|------------------|--------------------------------|----------------------------------------------|---------------------------------------------------------------|----------------------------|-------------------|----------------------------------------------------------|------------|-----------------------|
| P1      | 60  | M   | hCoV-19/France/ARA-HCL022018464001/2022 | 21K                | BA.1             | 0                              |                                              | 8                                                             | Convalescent plasma (D24)  | yes (D40)         | Diffuse large B-cell lymphoma R-DHAOX, CAR-T-cells (D26) | 3 doses    | 6 months              |
|         |     |     | hCoV-19/France/ARA-HCL022026019301/2022 |                    |                  | 12                             | S:P337S (100%)                               |                                                               |                            |                   |                                                          |            |                       |
|         |     |     | hCoV-19/France/ARA-HCL122005337501/2022 |                    |                  | 16                             |                                              |                                                               |                            |                   |                                                          |            |                       |
|         |     |     | hCoV-19/France/ARA-HCL022019927901/2022 |                    |                  | -1                             |                                              |                                                               |                            |                   |                                                          |            |                       |
| P2      | 70  | M   | hCoV-19/France/ARA-HCL022020258601/2022 | 21K                | BA.1             | 0                              |                                              | 10                                                            | No                         | ongoing follow-up | Heart transplant                                         | 3 doses    | 2 weeks               |
|         |     |     | hCoV-19/France/ARA-HCL022026296401/2022 |                    |                  | 9                              | S:E340A (71%)                                |                                                               |                            |                   |                                                          |            |                       |
|         |     |     | hCoV-19/France/ARA-HCL022019883201/2022 |                    |                  | -2                             |                                              |                                                               |                            |                   |                                                          |            |                       |
| P3      | 72  | F   | hCoV-19/France/ARA-HCL022033319501/2022 | 21K                | BA.1             | 18                             | S:P337S (100%)                               | 8                                                             | No                         | ongoing follow-up | Kidney transplant                                        | No         | ND                    |
|         |     |     | hCoV-19/France/ARA-HCL022037698401/2022 |                    |                  | 26                             | S:P337S (69%)                                |                                                               |                            |                   |                                                          |            |                       |
|         |     |     | hCoV-19/France/ARA-HCL022018573901/2022 |                    |                  | -1                             |                                              |                                                               |                            |                   |                                                          |            |                       |
| P4      | 52  | F   | hCoV-19/France/ARA-HCL122003445701/2022 | 21K                | BA.1             | 3                              |                                              | 4                                                             | No                         | ongoing follow-up | Gougerot Sjögren, rituximab                              | 3 doses    | 3 months              |
|         |     |     | hCoV-19/France/ARA-HCL122004037701/2022 |                    |                  | 5                              | S:P337S (52%) + S:E340D (28%)                |                                                               |                            |                   |                                                          |            |                       |
|         |     |     | hCoV-19/France/ARA-HCL122003970901/2022 |                    |                  | -1                             |                                              |                                                               |                            |                   |                                                          |            |                       |
| P5      | 19  | M   | hCoV-19/France/ARA-HCL122004577201/2022 | 21K                | BA.1             | 5                              |                                              | 2                                                             | No                         | ongoing follow-up | Germinal embryonal carcinoma                             | No         | ND                    |
|         |     |     | hCoV-19/France/ARA-HCL122005810301/2022 |                    |                  | 13                             | S:P337R (91%) + S:E340D (6%)                 |                                                               |                            |                   |                                                          |            |                       |
|         |     |     | hCoV-19/France/ARA-HCL022021154301/2022 |                    |                  | -2                             |                                              |                                                               |                            |                   |                                                          |            |                       |
| P6      | 59  | M   | hCoV-19/France/ARA-HCL022029928601/2022 | 21K                | BA.1             | 11                             | S:P337S (32%) + S:E340K (19%)                | 0                                                             | No                         | ongoing follow-up | Systemic scleroderma                                     | 3 doses    | 7 months              |
|         |     |     | hCoV-19/France/ARA-HCL022035008101/2022 |                    |                  | 19                             | S:P337S (29%) + S:E340K (56%); S:E340D (44%) |                                                               |                            |                   |                                                          |            |                       |
|         |     |     | hCoV-19/France/ARA-HCL022050390701/2022 |                    |                  | 42                             | S:E340K (100%)                               |                                                               |                            |                   |                                                          |            |                       |
|         |     |     | hCoV-19/France/ARA-HCL122009595001/2022 |                    |                  | 43                             | S:E340K (100%)                               |                                                               |                            |                   |                                                          |            |                       |
| P7      | 59  | M   | hCoV-19/France/ARA-HCL022044350101/2022 | 21K                | BA.1             | 23                             | S:E340Q (100%)                               | ND                                                            | No                         | ND                | Heart transplant multiple sclerosis                      | ND         | ND                    |
| P8      | 75  | M   | hCoV-19/France/NAQ-HCL022053231601/2022 | 21L                | BA.2             | 6                              | S:E340D (84%)                                | 0                                                             | No                         | ND                |                                                          |            |                       |

ND: No Data; R-DHAOX : rituximab, cisplatin, dexamethasone, and high-dose cytarabine



86 **Table S2.** Demography, clinical and virological data of patients carrying a S:337 and/or S:340  
87 mutant virus after treatment with sotrovimab.

88

| Sublineage                         | total    | S:337 mutation | %      | S:340 mutation only | %      | S:337 + S:340 mutations | %      | Total of S:337 and/or S:340 mutations | %      |
|------------------------------------|----------|----------------|--------|---------------------|--------|-------------------------|--------|---------------------------------------|--------|
| BA.1                               | 9300104  | 261            | 0-003% | 1872                | 0-020% | 88                      | 0-001% | 2045                                  | 0-021% |
| BA.2                               | 741958   | 18             | 0-002% | 703                 | 0-095% | 5                       | 0-001% | 711                                   | 0-095% |
| BA.3                               | 695      | 0              | 0-000% | 0                   | 0-000% | 0                       | 0-000% | 0                                     | 0-000% |
| Total Omicron (BA.1 + BA.2 + BA.3) | 10042757 | 274            | 0-003% | 2575                | 0-026% | 93                      | 0-001% | 2756                                  | 0-027% |

89

90

91 **Table S3.** Prevalence of S:337 and/or S:340 substitutions in Omicron sequences available on

92 GISAID (Global Initiative on Sharing Avian Influenza Data) Database (on April 5<sup>th</sup> 2022).

93

94 **Data availability**

95 Individual consensus sequences are available at <https://www.gisaid.org/> with virus names in  
96 supplementary Tables S1 and S2. Raw fastqfiles are available upon request.

97
